# Supplementary material for: Placenta and appetite genes GDF15 and IGFBP7 are associated with hyperemesis gravidarum
Source: PubMed Central journal article supplement (PMC5862842; doi:10.1038/s41467-018-03258-0), 2018-03-21
Supplement: 41467_2018_3258_MOESM1_ESM.pdf [file 41467_2018_3258_MOESM1_ESM.pdf]

**Supplementary information for**

**Placenta and appetite genes *GDF15* and *IGFBP7* are associated with hyperemesis  
gravidarum**

Fejzo et al.

**Supplementary Figure 1.** Quantile-quantile plots for a) SCAN1 (binary phenotype) and b) SCAN2 (ordinal phenotype).

a)

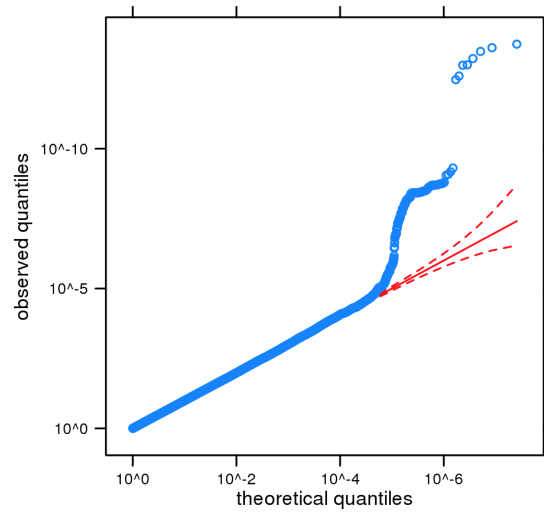

b)

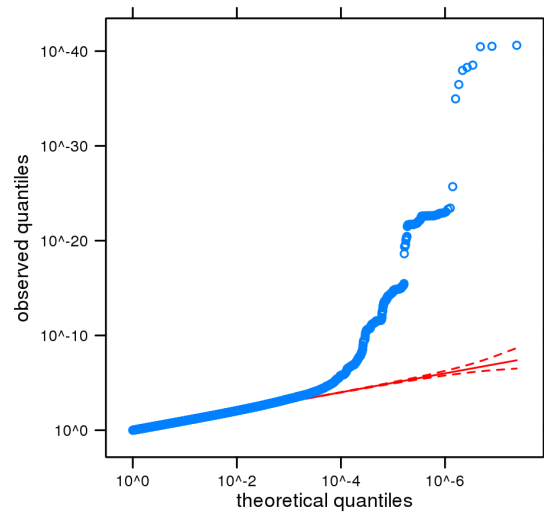

**Supplementary Figure 2. LocusZoom plots for loci with  $P$ -values  $< 10^{-6}$  in SCAN1.**

a) chr19p13.11

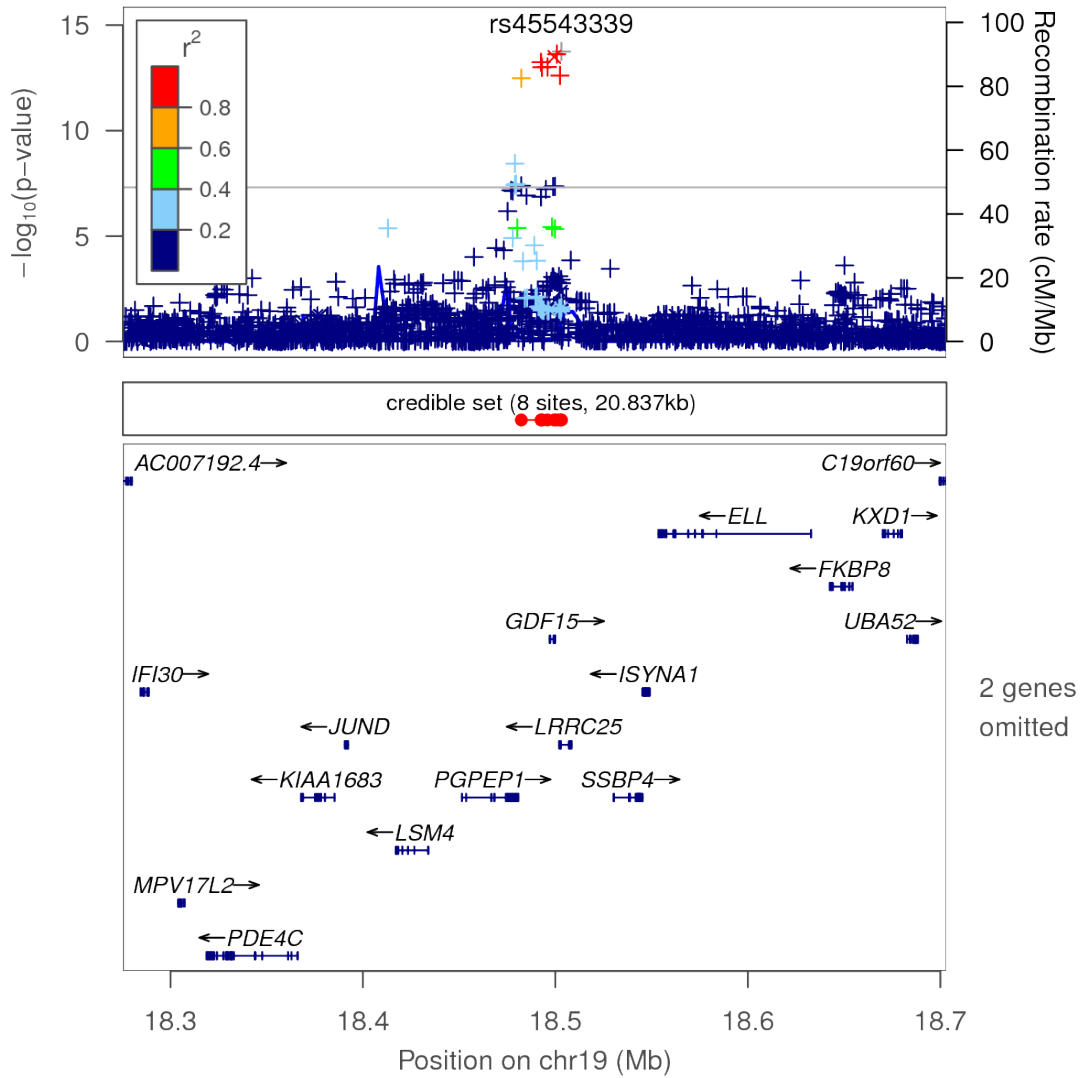

b) chr4q12

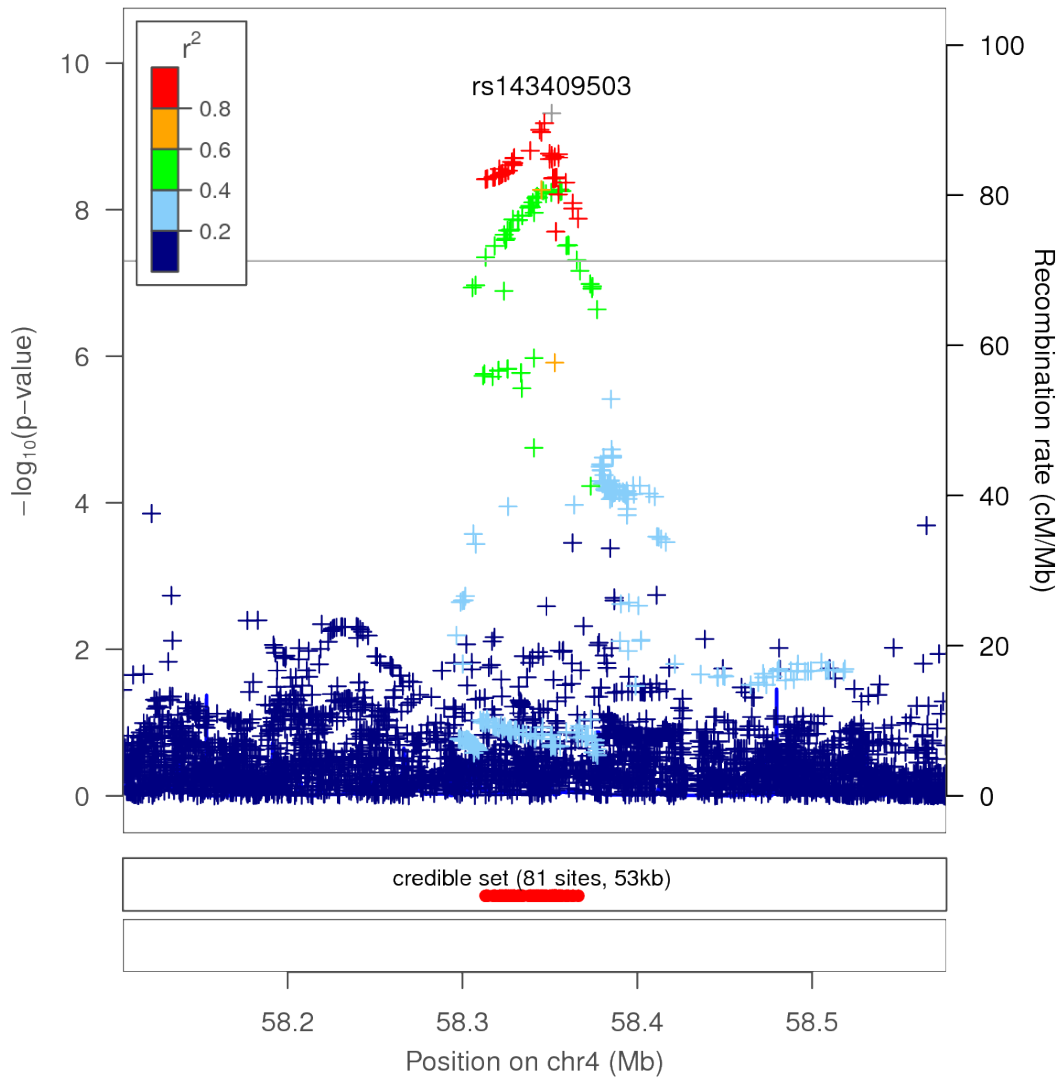

c) 22q12.3

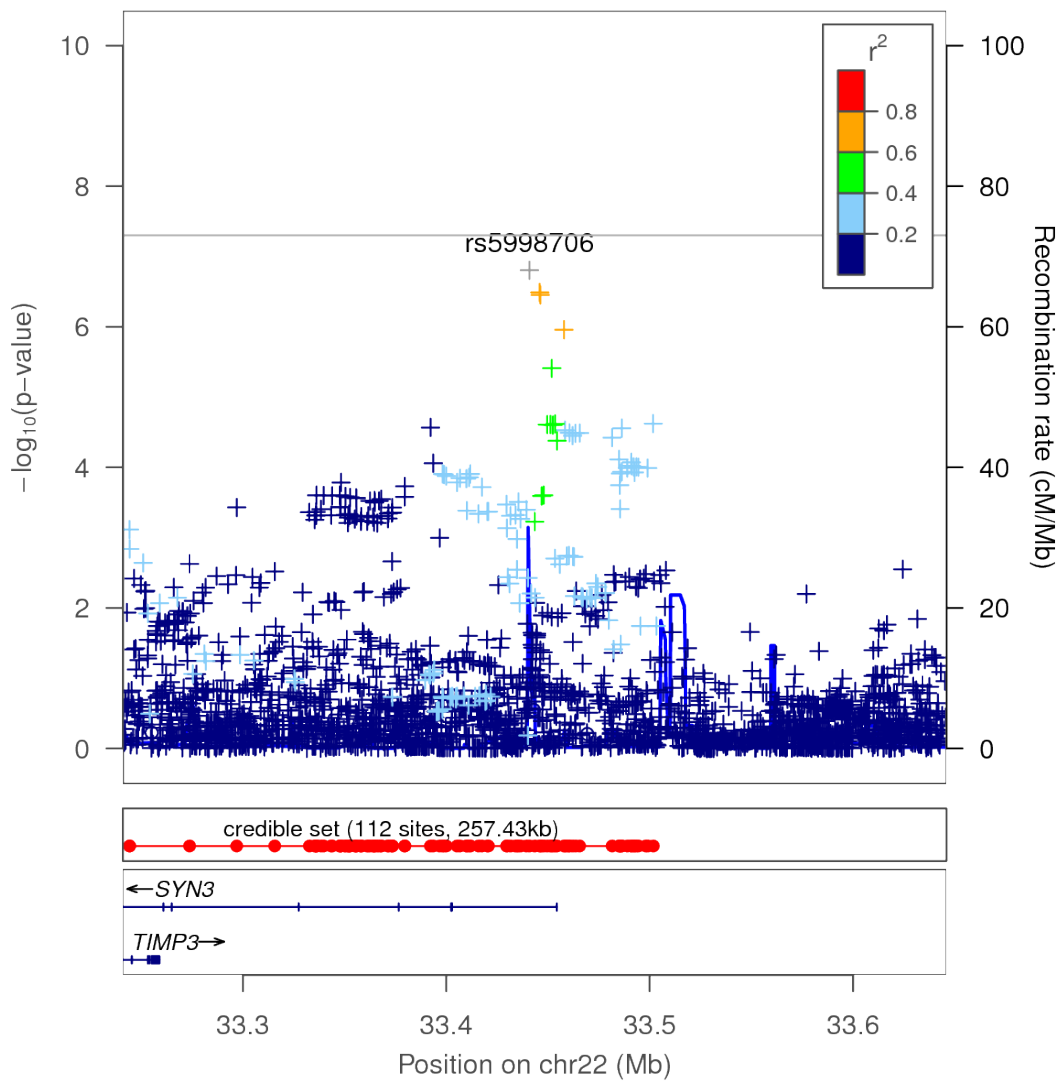

d) chr2q33.3

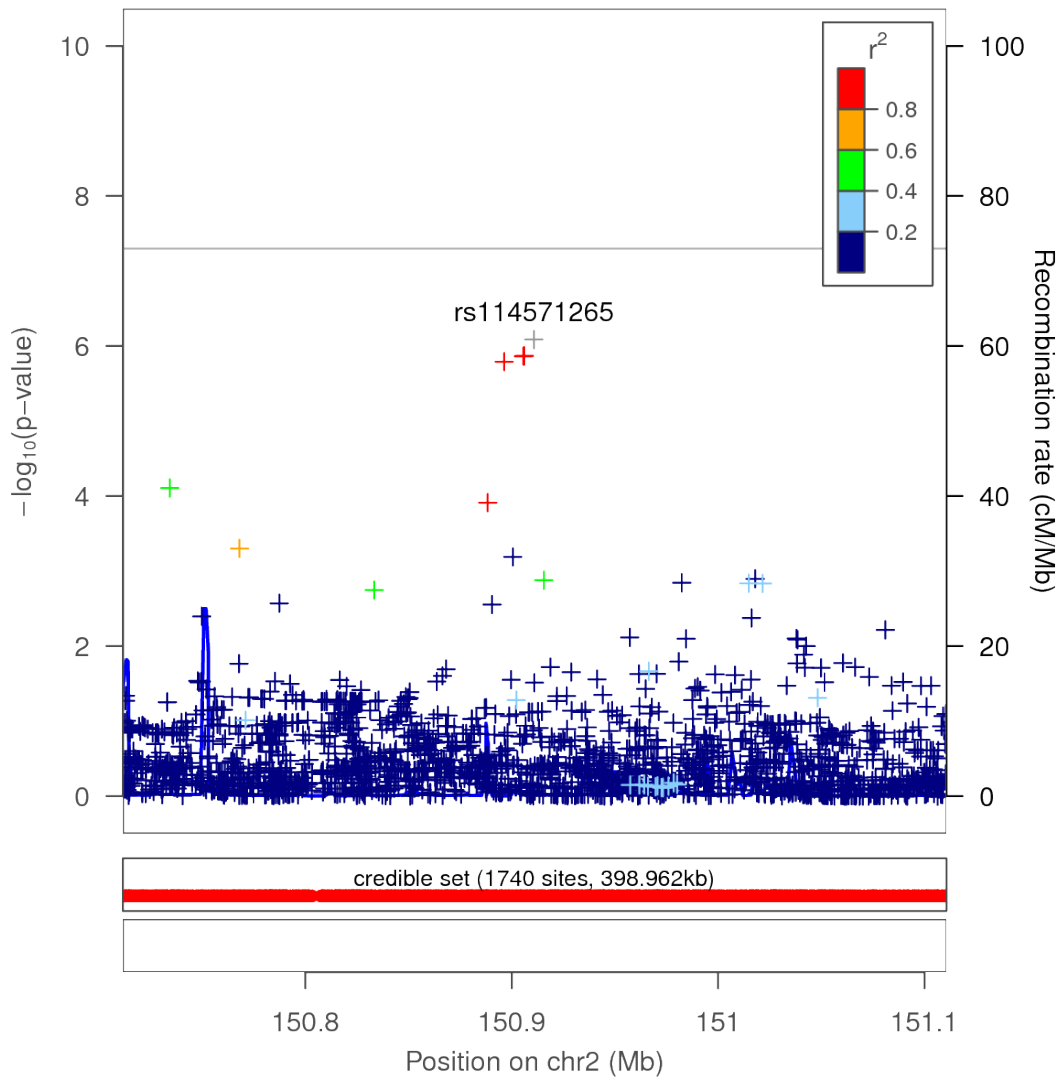

e) chr9q31.2

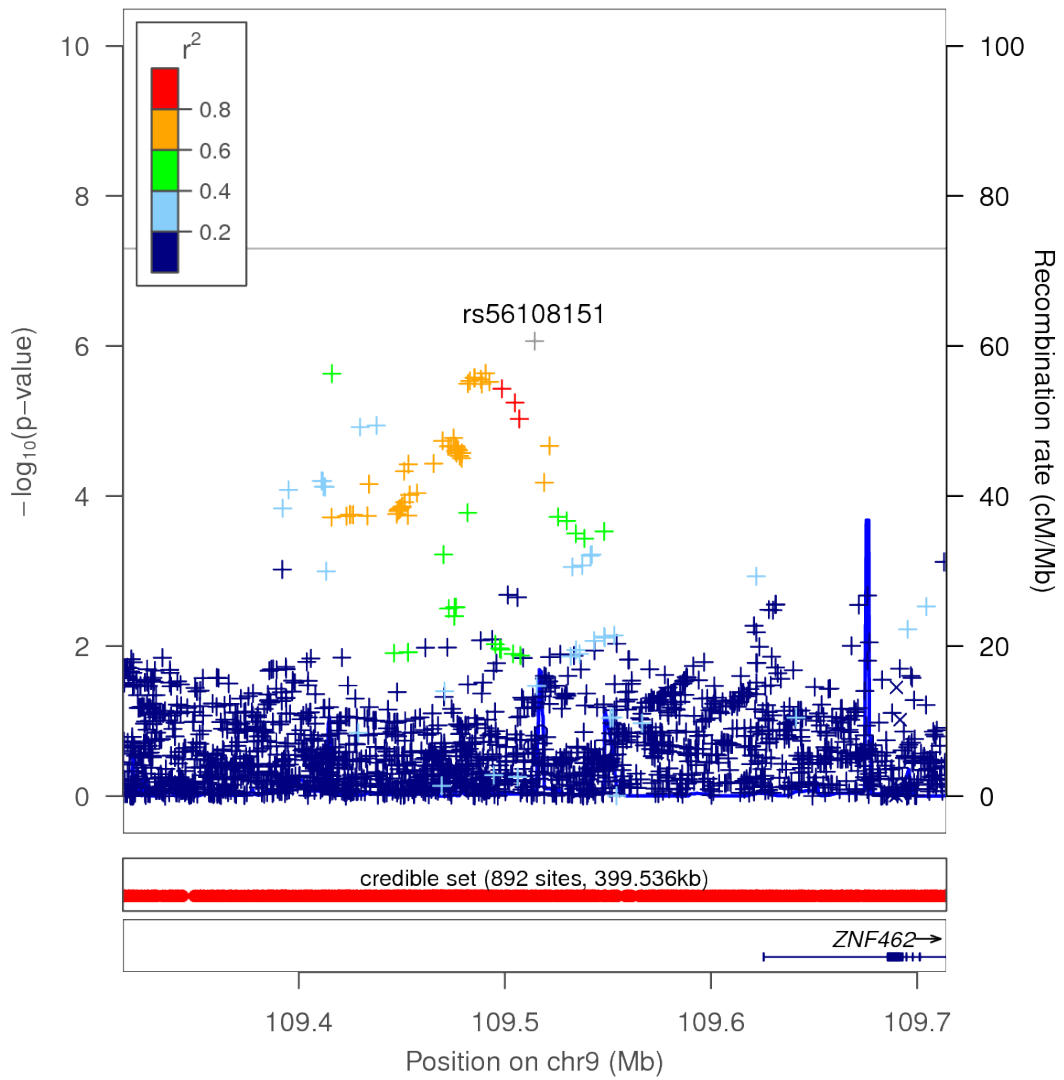

**Supplementary Figure 3.** LocusZoom plots for loci with  $P$ -values  $< 5 \times 10^{-8}$  in SCAN2.

a) chr19p13.11

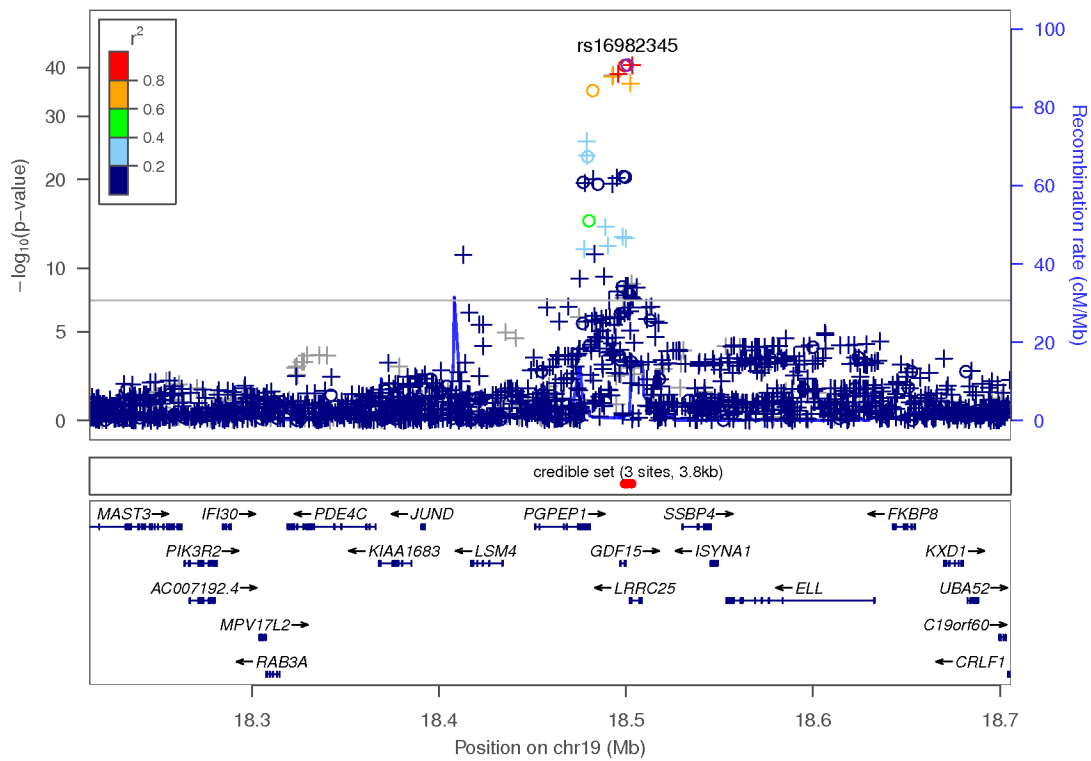



b) chr4q12

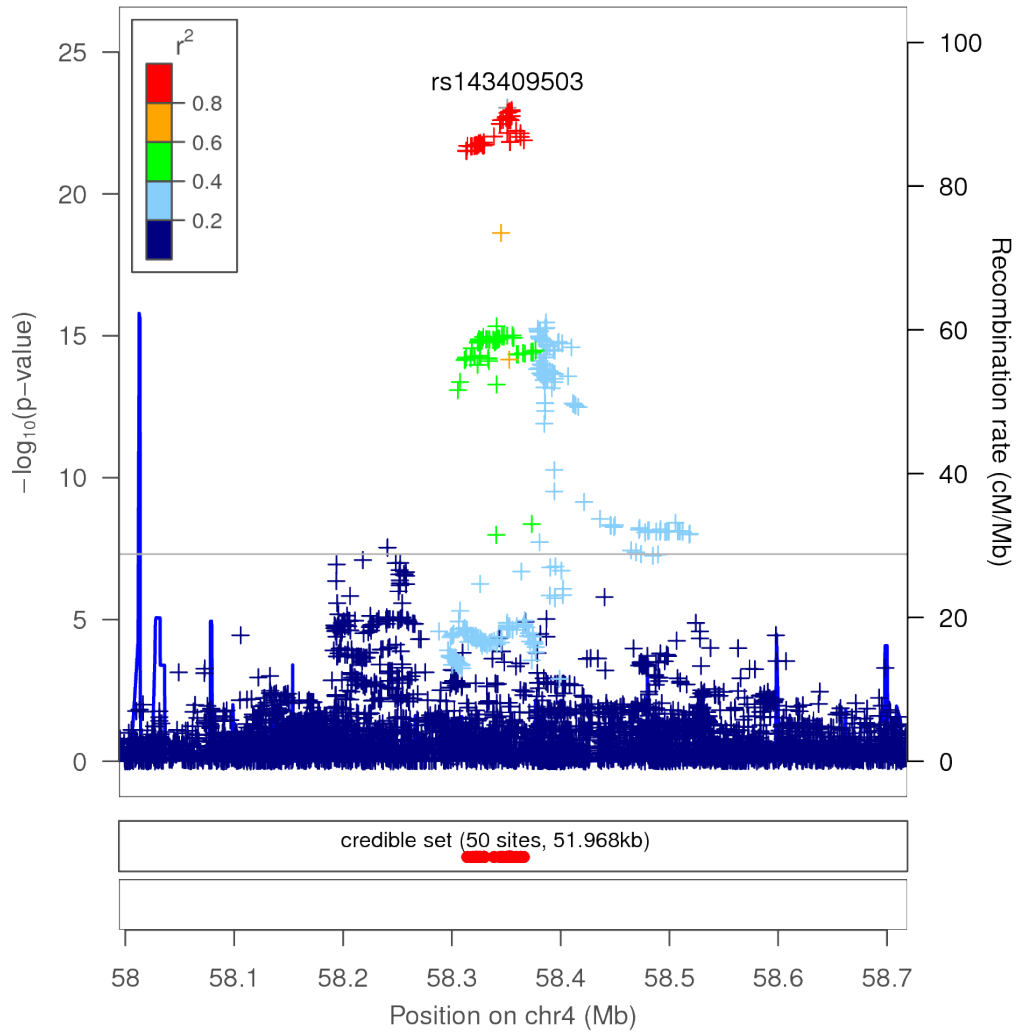

c) 11q22.1

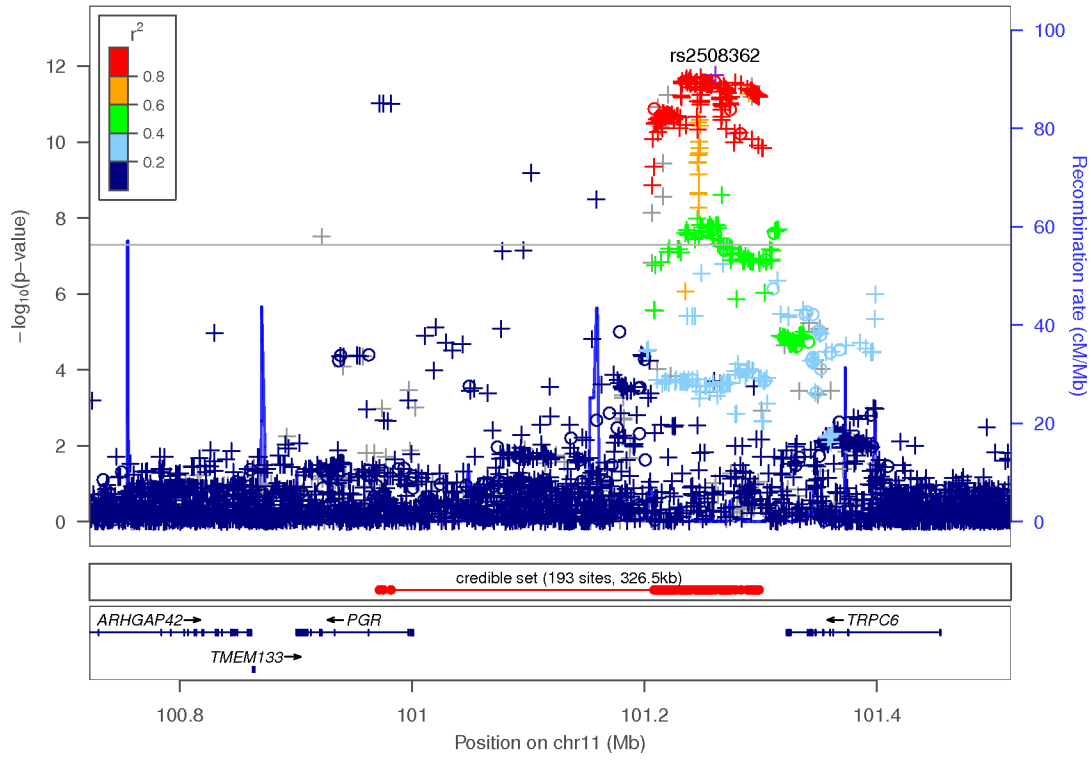

d) chr6p15

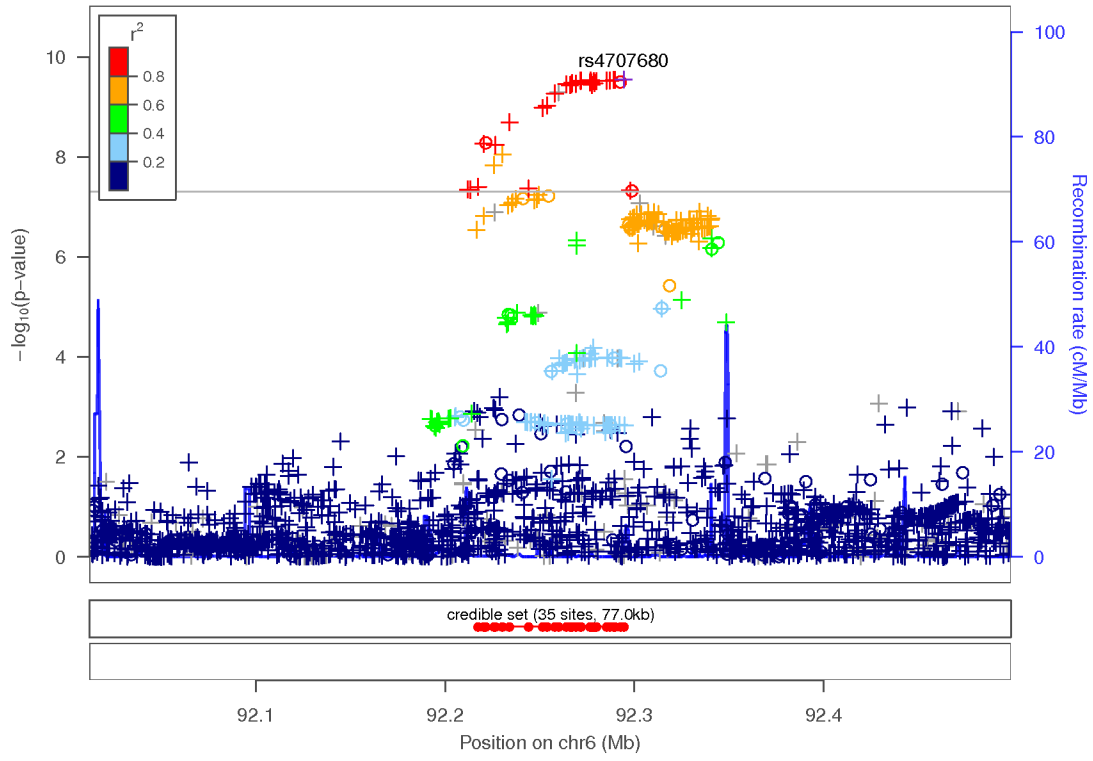

e) 22q11.23

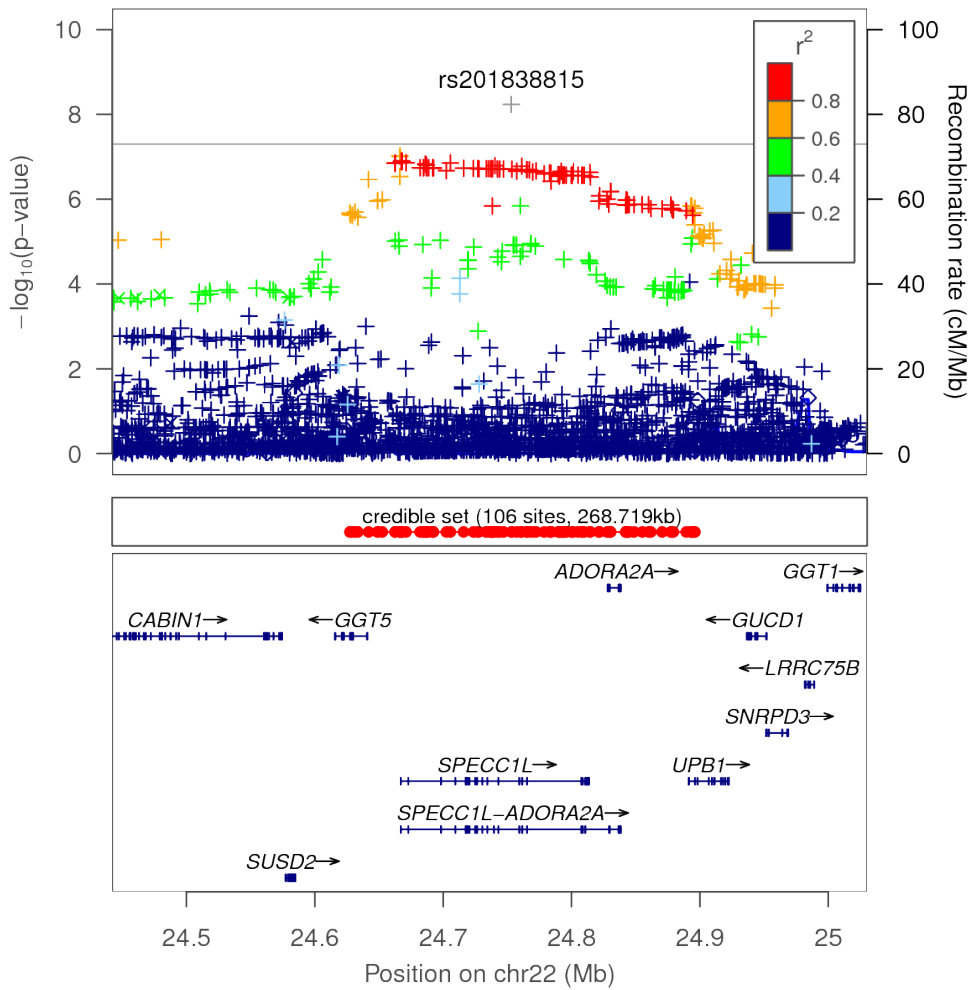

f) 6p12.1

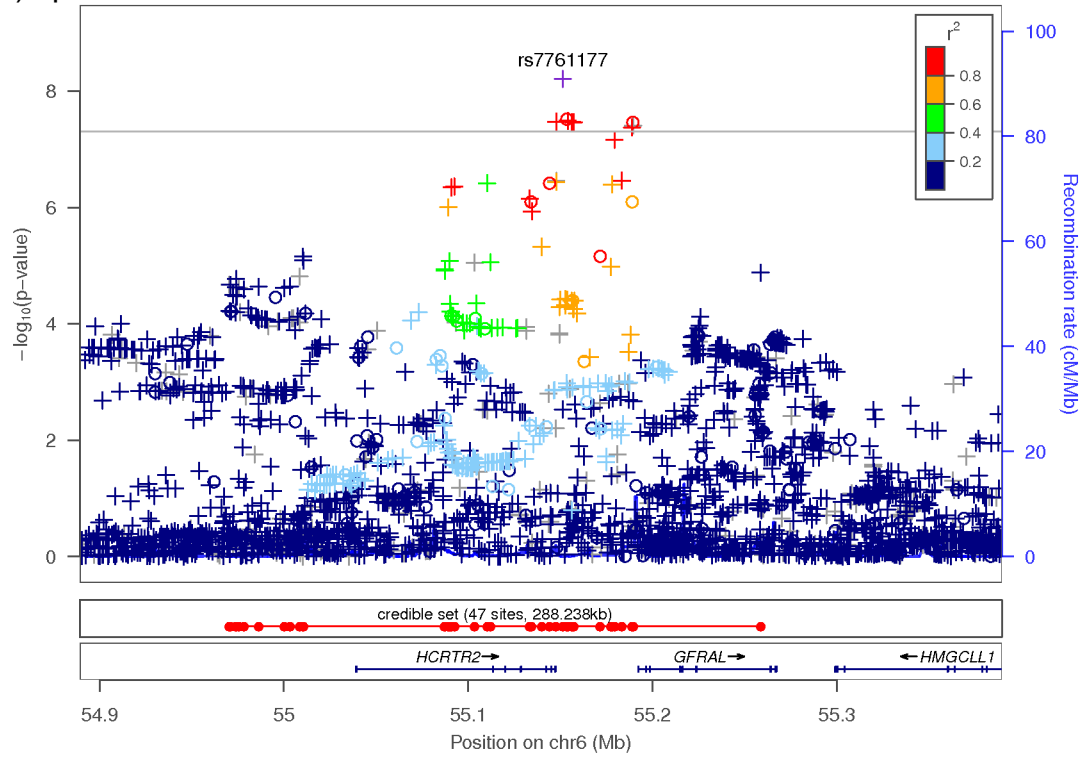

g) chr4q31.12

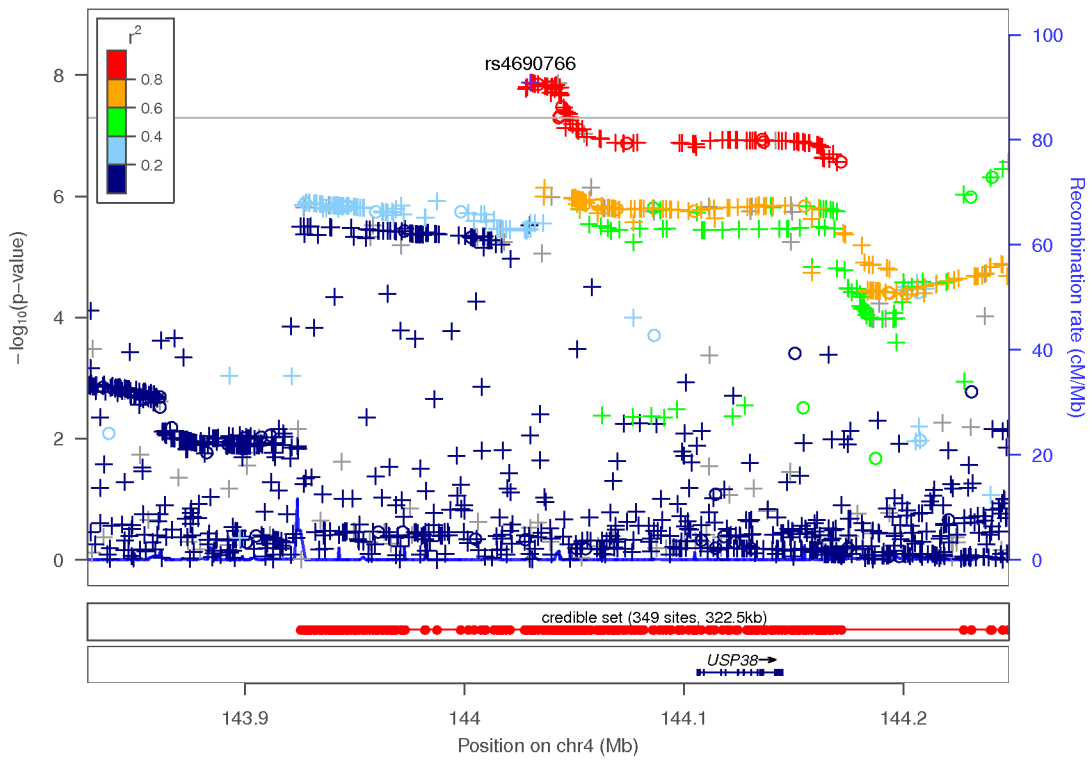

**Supplementary Figure 4.** LocusZoom plots illustrating stepwise conditional regression in (a) SCAN1 and (b) SCAN2, at the chr19p13.11 locus.

(a) SCAN1

**Step 1:** The GWAS signal, best SNP is rs45543339,  $p = 1.8 \times 10^{-14}$

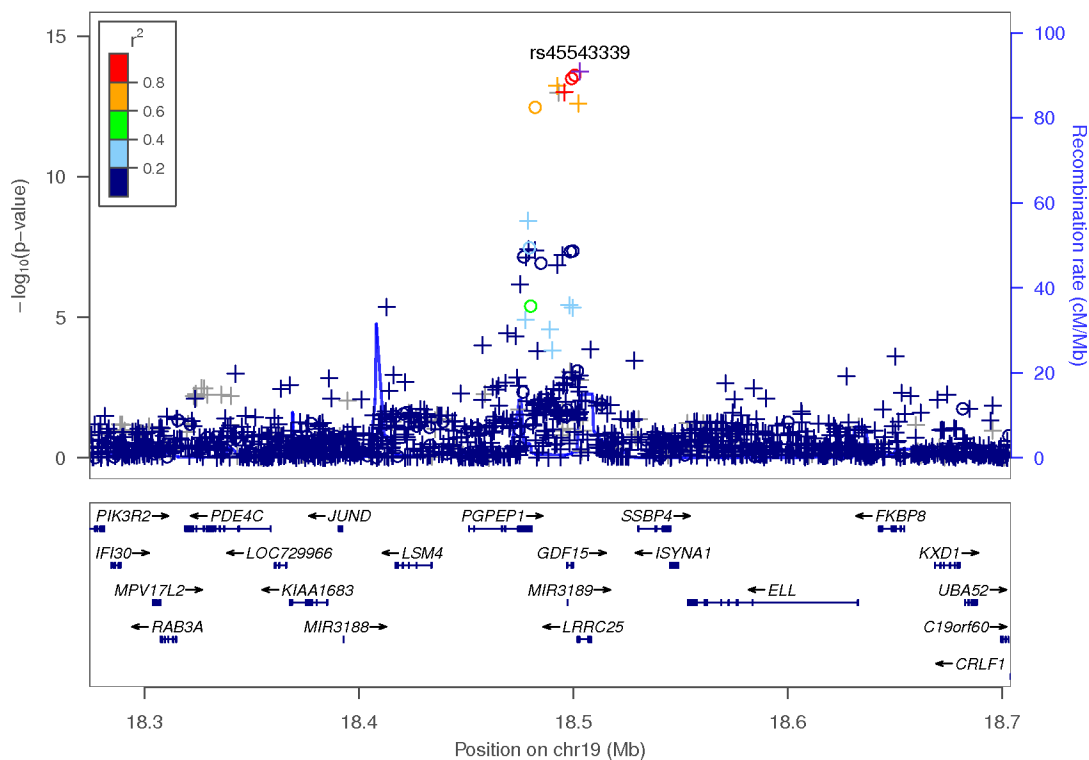

**Step 2:** The GWAS signal, best SNP is rs1054221,  $p = 1.7 \times 10^{-7}$

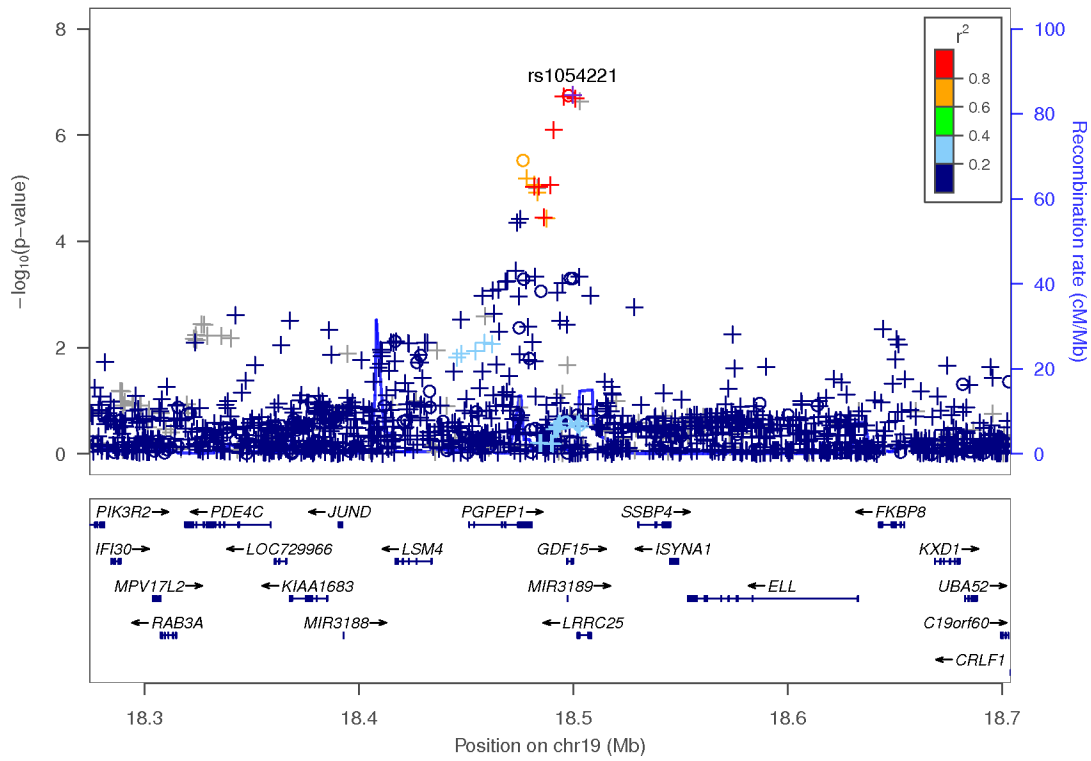



### Step 3: No significant association signals at $p < 10^{-5}$

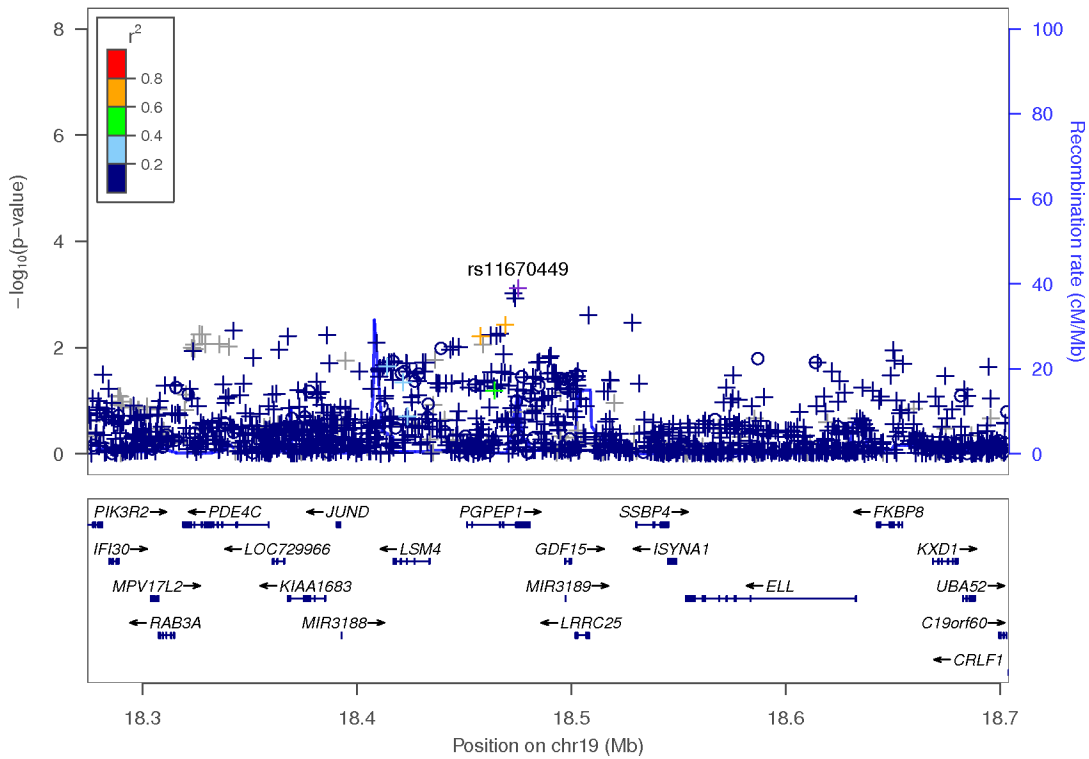

(b) SCAN2

**Step 1:** The GWAS signal, best SNP is rs16982345,  $p = 2.4 \times 10^{-41}$

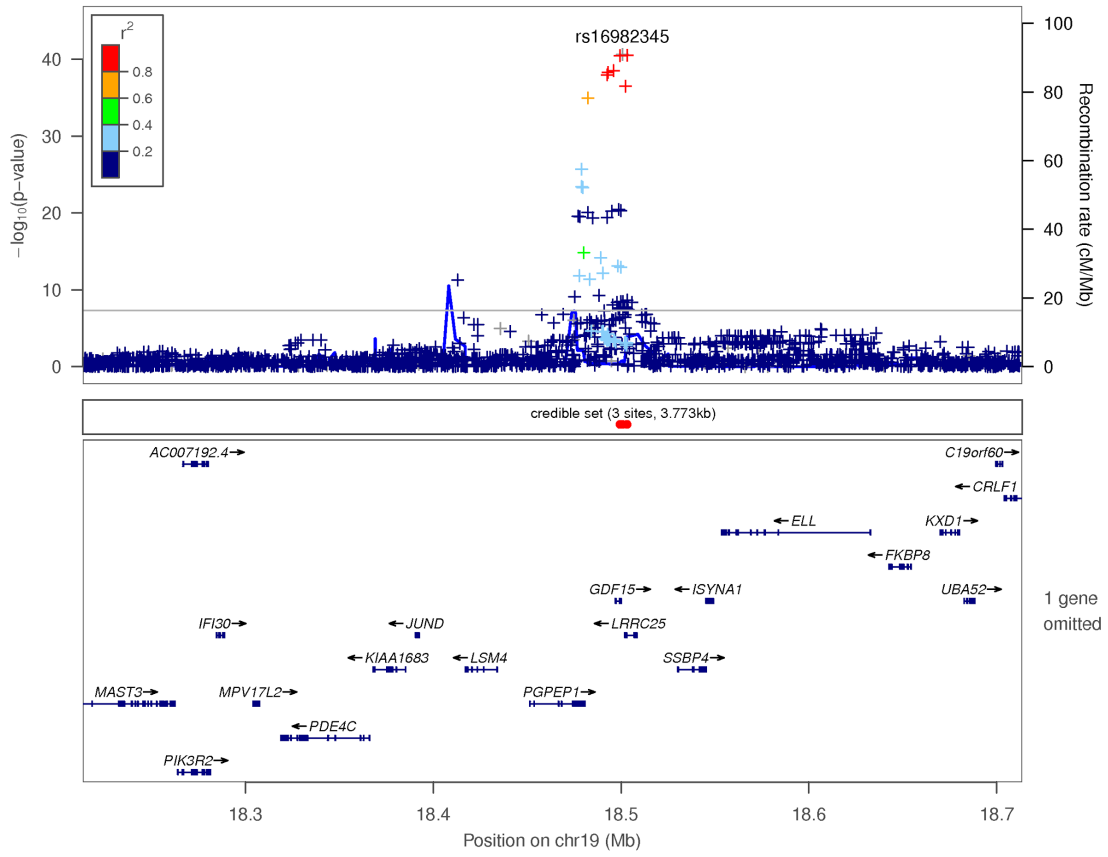

**Step 2: Best SNP is rs34345957,  $p = 3.5 \times 10^{-21}$**

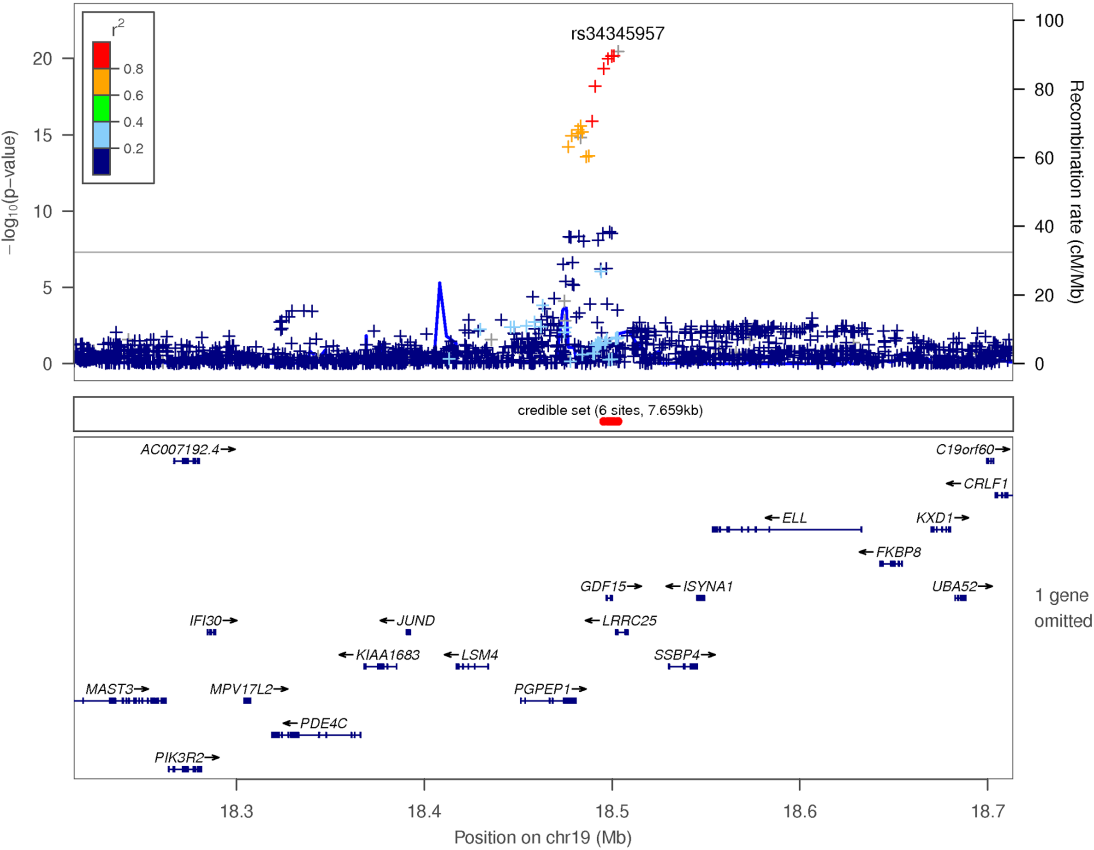

**Step 3: Best SNP is rs4808787,  $p = 2.1 \times 10^{-6}$**

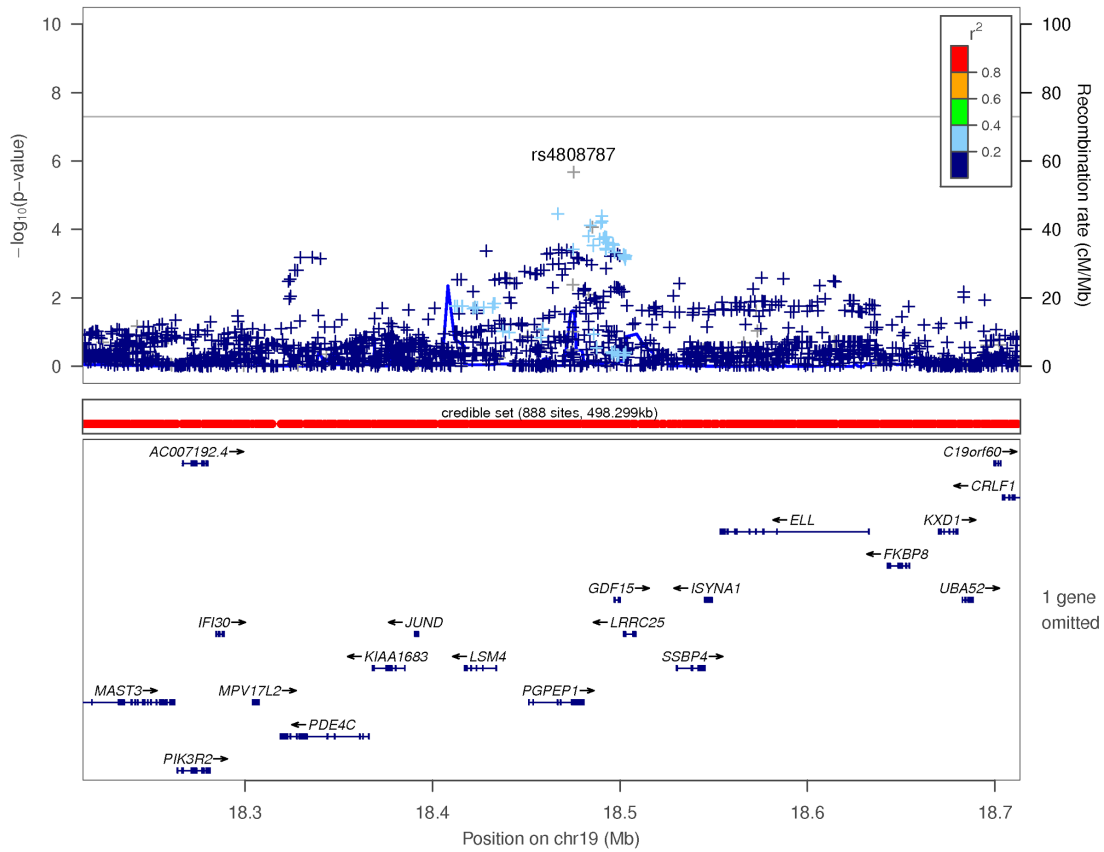

### Step 4: No significant association signals at $p < 10^{-5}$

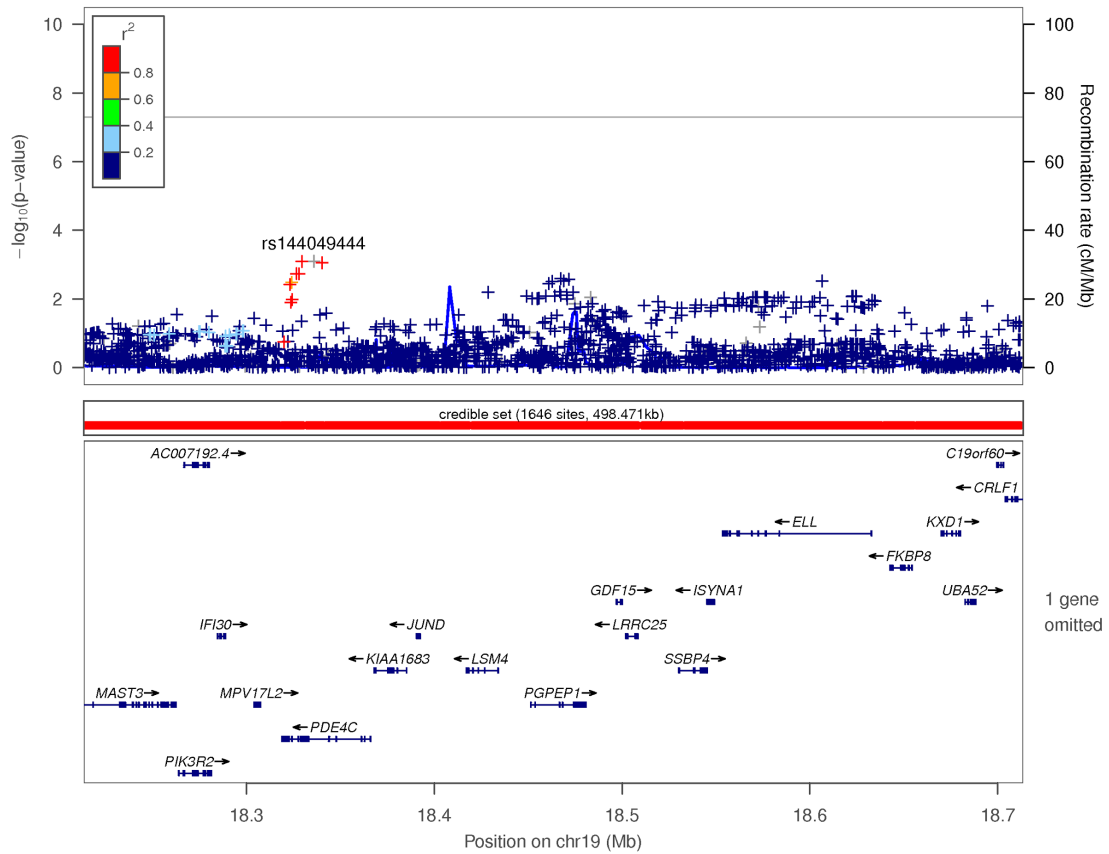

**Supplementary Figure 5.** LocusZoom plots illustrating stepwise conditional regression in SCAN2, at the 11q22.1 locus.

**Step 1:** The GWAS signal, best SNP is rs2508362,  $p = 1.7 \times 10^{-12}$

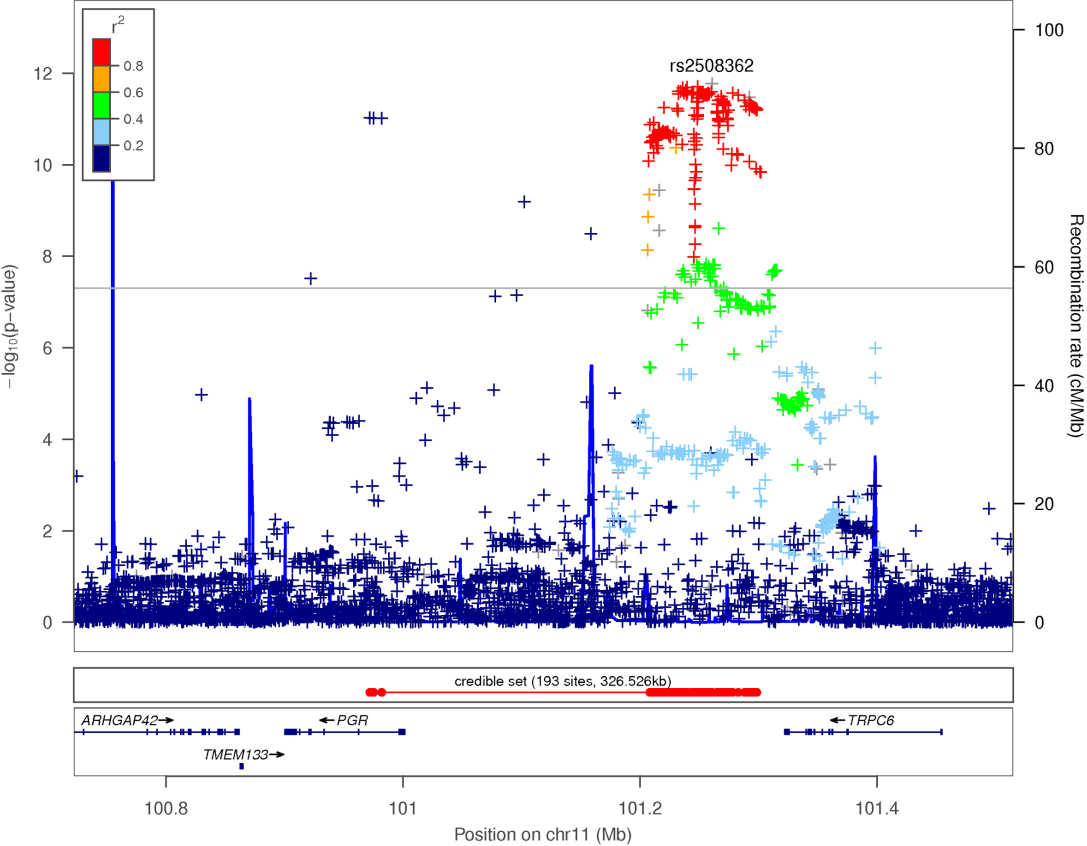

Step 2: Best SNP is rs78025546,  $p = 1.1 \times 10^{-12}$

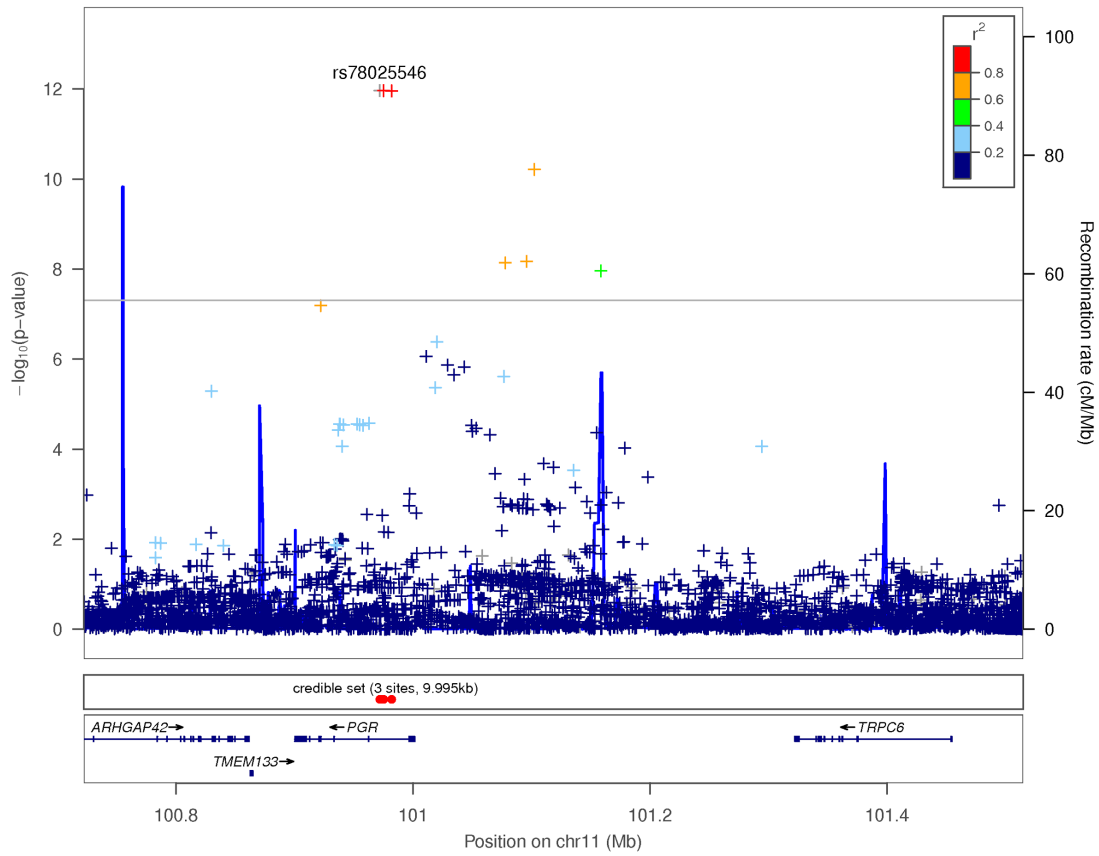

**Step 3: No significant association signals at  $p < 10^{-5}$**

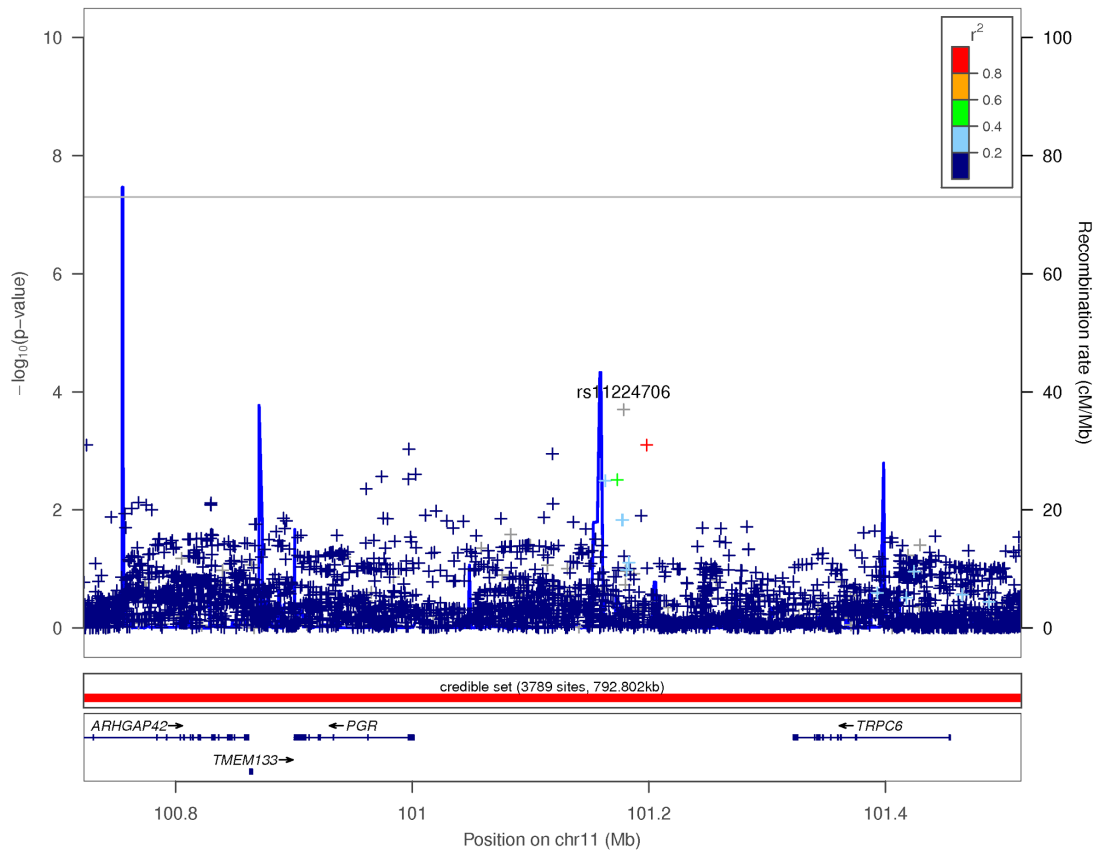



**Supplementary Table 1.** Cohort overlap statistics (a) and SNP-level QC information for b) SCAN1 and c) SCAN2.

a) Individuals included in both SCAN1 and SCAN2 cohorts. Exact counts of 5 or fewer individuals were masked to protect the privacy of 23andMe customers.

| Phenotype             | SCAN1 - Case | SCAN1 - Control |
|-----------------------|--------------|-----------------|
| SCAN2 - “None”        | 0            | 14,944          |
| SCAN2 - “Slight”      | 0            | 0               |
| SCAN2 - “Moderate”    | ≤ 5          | 0               |
| SCAN2 - “Severe”      | ≤ 5          | 0               |
| SCAN2 - “Very Severe” | 1,216        | 0               |

b)

Results for QC filters on genotyped data

|                           | failed | passed  |
|---------------------------|--------|---------|
| no filters                | 0      | 1050074 |
| not V/V2-only, chrM, chrY | 34319  | 1015755 |
| parent-offspring test     | 6291   | 1009544 |
| MAF > 0%                  | 3510   | 1006267 |
| HWE > 1e-20               | 59234  | 948340  |
| gt.rate > 90%             | 29643  | 931193  |
| batch effects             | 39525  | 921199  |

Results for QC filters on imputed dosage data

|                    | failed  | passed   |
|--------------------|---------|----------|
| no filters         | 0       | 15574220 |
| MAF > 0%           | 0       | 15574220 |
| imputation quality | 2502882 | 13071338 |
| batch effects      | 65      | 13071338 |

Results for QC filters on merged association test results

|              | failed   | passed   |
|--------------|----------|----------|
| imputed only | 12224646 | 12224646 |
| both passed  | 846234   | 13070880 |

|                    |         |          |
|--------------------|---------|----------|
| genotyped only     | 74965   | 13145845 |
| no test result     | -35599  | 13110246 |
| failed to converge | -422362 | 12687884 |

c)

Results for QC filters on genotyped data

|                           | <b>failed</b> | <b>passed</b> |
|---------------------------|---------------|---------------|
| no filters                | 0             | 1050074       |
| not V/V2-only, chrM, chrY | 34319         | 1015755       |
| parent-offspring test     | 6291          | 1009544       |
| MAF > 0%                  | 3510          | 1006267       |
| HWE > 1e-20               | 59234         | 948340        |
| gt.rate > 90%             | 29643         | 931193        |
| batch effects             | 39525         | 921199        |

Results for QC filters on imputed dosage data

|                    | <b>failed</b> | <b>passed</b> |
|--------------------|---------------|---------------|
| no filters         | 0             | 15574220      |
| MAF > 0%           | 0             | 15574220      |
| imputation quality | 2502882       | 13071338      |
| batch effects      | 65            | 13071328      |

Results for QC filters on merged association test results

|                    | <b>failed</b> | <b>passed</b> |
|--------------------|---------------|---------------|
| imputed only       | 12224646      | 12224646      |
| both passed        | 846234        | 13070880      |
| genotyped only     | 74965         | 13145845      |
| no test result     | -23768        | 13122077      |
| failed to converge | -1165146      | 11956931      |

**Supplementary Table 2.** Association signals in SCAN2 with  $5 \times 10^{-8} < p\text{-value} < 10^{-6}$ .

| marker      | position    | alleles | MAF   | P-value              | $\beta$ | 95% CI          | Gene context         |
|-------------|-------------|---------|-------|----------------------|---------|-----------------|----------------------|
| rs2076308   | 6:50791640  | G/C     | 0.184 | $2.7 \times 10^{-7}$ | 0.045   | [0.028, 0.062]  | [TFAP2B]             |
| rs11793821  | 9:86184504  | A/G     | 0.14  | $3.0 \times 10^{-7}$ | -0.050  | [-0.069,-0.031] | FRMD3--[ ]--IDNK     |
| rs35970726  | 22:33481511 | A/-     | 0.319 | $3.2 \times 10^{-7}$ | 0.037   | [0.023, 0.052]  | SYN3--[ ]---LARGE    |
| rs17077506  | 13:84508874 | C/G     | 0.134 | $6.9 \times 10^{-7}$ | -0.049  | [-0.068,-0.030] | SLITRK1--[ ]         |
| rs148644662 | 4:157658837 | G/T     | 0.001 | $7.0 \times 10^{-7}$ | 0.636   | [0.385,0.888]   | CTSO---[ ]--PDGFC    |
| rs11398016  | 21:22910644 | -/T     | 0.475 | $7.3 \times 10^{-7}$ | -0.033  | [-0.046,-0.020] | [NCAM2]              |
| rs12992546  | 2:237918501 | T/C     | 0.341 | $7.5 \times 10^{-7}$ | 0.035   | [0.021, 0.049]  | CXCR7---[ ]--COPS8   |
| rs75481205  | 6:100228145 | A/G     | 0.048 | $9.6 \times 10^{-7}$ | -0.087  | [-0.122,-0.052] | PRDM13---[ ]---MCHR2 |

**Supplementary Table 3.** Joint model results of step-wise conditional analysis for a) SCAN1 and b) SCAN2. Values are reported with respect to the first allele.

a)

| locus       | step | marker     | position    | alleles | <i>P</i> -value       | OR [95% CI]        | Gene context      |
|-------------|------|------------|-------------|---------|-----------------------|--------------------|-------------------|
| chr19p13.11 | 1    | rs45543339 | 19:18503194 | C/T     | $3.3 \times 10^{-18}$ | 0.63 [0.563,0.696] | [ <i>LRRC25</i> ] |
| chr19p13.11 | 2    | rs1054221  | 19:18499858 | C/T     | $1.7 \times 10^{-07}$ | 1.38 [1.22,1.56]   | [ <i>GDF15</i> ]  |

b)

| locus       | step | marker     | position     | alleles | <i>P</i> -value       | $\beta$ | 95% CI          | Gene context                   |
|-------------|------|------------|--------------|---------|-----------------------|---------|-----------------|--------------------------------|
| chr19p13.11 | 1    | rs16982345 | 19:18500722  | A/G     | $1.4 \times 10^{-64}$ | 0.133   | [0.118,0.148]   | <i>GDF15/</i><br><i>LRRC25</i> |
| chr19p13.11 | 2    | rs34345957 | 19:18503168  | -/G     | $1.1 \times 10^{-28}$ | 0.108   | [0.089,0.127]   | <i>LRRC25</i>                  |
| chr19p13.11 | 3    | rs4808787  | 19:18475285  | A/G     | $6.0 \times 10^{-6}$  | -0.037  | [-0.053,-0.021] | <i>PGPEP1</i>                  |
| 11q22.1     | 1    | rs2508362  | 11:101260798 | A/G     | $5.0 \times 10^{-16}$ | 0.064   | [0.049,0.080]   | <i>PGR/</i><br><i>TRPC6</i>    |
| 11q22.1     | 2    | rs78025546 | 11:100972022 | A/G     | $6.2 \times 10^{-14}$ | 0.167   | [0.124,0.211]   | <i>PGR</i>                     |

## Supplementary Note 1

Studies of other phenotypes showing association with *GDF15* and *IGFBP7*

Other SNPs in *GDF15* have been associated with body mass index,<sup>45</sup> HDL cholesterol levels,<sup>19</sup> prostate cancer,<sup>42,44</sup> cardiovascular disease,<sup>41,43</sup> systemic lupus erythematosus and periodontitis (GWAS catalog <http://www.ebi.ac.uk/gwas/>, accessed May 2017). The only SNP at the *IGFBP7* locus reported in a previous GWAS, rs11133504, in weak LD with rs14309503 and rs4865234 (Supplementary Data 1), was an NHGRI/GBI GWAS association signal in ulcerative colitis.<sup>46</sup> Other SNPs in *IGFBP7* have been associated with age-related macular degeneration,<sup>47,48</sup> AgG glycosylation,<sup>49</sup> opioid dependence in males,<sup>50</sup> cotinine glucuronidation,<sup>51</sup> head and neck cancer risk,<sup>52</sup> bisphosphonate-induced osteonecrosis of the jaw in humans,<sup>53</sup> cow and sheep pigmentation,<sup>54,55</sup> and porcine hematological parameters.<sup>56</sup>

## Supplementary Note 2

The Severe Morning Sickness phenotype refers to HG.

Six questions used to derive (classifications of) phenotypes:

- 1) Did you experience morning sickness during your pregnancy?
  - A1: Yes
  - A2: No
  - A3: I'm not sure
  
- 2) Did you experience morning sickness during any of your pregnancies?
  - A1: Yes
  - A2: No
  - A3: I'm not sure
  
- 3) How severe was your morning sickness?
  - A1: Mild (occasional bouts of queasiness or nausea, did not require treatment)
  - A2: Moderate (nausea and some vomiting, but did not require treatment)
  - A3: Severe (Severe nausea and vomiting that required treatment)
  - A4: Very severe (requiring hospitalization and intravenous fluid (IV) therapy)
  - A5: I'm not sure
  
- 4) For the pregnancy in which you had the worst morning sickness, how severe was your morning sickness?
  - A1: Mild (occasional bouts of queasiness or nausea, did not require treatment)
  - A2: Moderate (nausea and some vomiting, but did not require treatment)
  - A3: Severe (Severe nausea and vomiting that required treatment)
  - A4: Very severe (requiring hospitalization and intravenous fluid (IV) therapy)
  - A5: I'm not sure
  
- 5) Did you experience morning sickness?
  - A1: Yes, it was mild enough that I did not require treatment
  - A2: Yes, it was severe enough that I required treatment
  - A3: No
  - A4: I'm not sure
  
- 6) Did you ever get intravenous fluid (IV) therapy for nausea and vomiting (morning sickness) during pregnancy?
  - A1: Yes
  - A2: No
  - A3: I don't know

From these questions, we mapped onto a phenotype that scales morning sickness severity as follows:

HG cases were defined as individuals who gave ANY of the following answers: Q3:A4, Q4:A4, or Q6:A1, and also did not give ANY of the following: Q1:A2, Q2:A2, or Q5:A3.

Controls were defined as individuals who gave ANY of the following answers: Q1:A2, Q2:A2, or Q5:A3, but also did not give other answers that were inconsistent.

Phenotypes for cases and controls were considered mutually exclusive and reasonable filters were applied to include only individuals whose responses were logically consistent.

HG cases (Q3:A4, Q4:A4, Q6:A1 and NOT Q1:A2, Q2:A2, or Q5:A3)  
1,306 research participants

Controls (Q1:A2, Q2:A2, Q5:A3)  
15,756 research participants

For the ordinal phenotype related to HG analyzed in SCAN2, data were pulled from the following four questions:

1) “Did you experience morning sickness during your pregnancy? (morning\_sickness)” (Yes, No, I’m not sure)

2) “Did you experience morning sickness during any of your pregnancies? (morning\_sickness\_any)” (Yes, No, I’m not sure)

3) “How severe was your morning sickness? (morning\_sickness\_severity)”  
1=Mild (occasional bouts of queasiness or nausea, did not require treatment),  
2=Moderate (nausea and some vomiting, but did not require treatment),  
3=Severe (Severe nausea and vomiting that required treatment),  
4=Very severe (requiring hospitalization and intravenous fluid (IV) therapy),  
NA=I’m not sure

4) “For the pregnancy in which you had the worst morning sickness, how severe was your morning sickness?

(worst\_morning\_sickness\_severity)”

(1=mild,2=moderate,3=severe,4=very\_severe,NA=I’m not sure)



From these questions NVP level was defined on a five-point scale, from “none” to “very severe,” as follows: The phenotype was scored 0 on a five-point scale if a participant reported a negative answer to either of the first two questions (morning\_sickness or morning\_sickness\_any). Scores 1 through 4 were defined from answers to questions 3 and 4 (morning\_sickness\_severity and worst\_morning\_sickness\_severity). When a participant answered both questions, the highest-scoring answer was used as the response. The phenotype was set to NA for the answer “I’m not sure” to any of the four questions.
