# Supplementary material for: Placenta and appetite genes GDF15 and IGFBP7 are associated with hyperemesis gravidarum
Source: PubMed Central journal article supplement (PMC5862842; doi:10.1038/s41467-018-03258-0), 2018-03-21
Supplement: 41467_2018_3258_MOESM2_ESM.pdf [file 41467_2018_3258_MOESM2_ESM.pdf]

### **Description of Additional Supplementary Files**

File Name: Supplementary Data 1

Description: Annotation using query SNPs rs45543339, rs143409503, and variants with  $r^2 \geq 0.2$ .

File Name: Supplementary Data 2

Description: SNPs associated with altered expression of gene GDF15

Legend: no legend.
